# Supplementary material for: Misshandlungs- und Vernachlässigungserfahrungen in der Kindheit: Ein Risikofaktor für die soziale Teilhabe ehemals außerfamiliär platzierter junger Erwachsener
Source: Atypon-hosted journal article supplement (doi:10.1026/0942-5403/a000366), 2022-01-01
Supplement: 0942-5403_a000366_esm1.pdf [file 0942-5403_a000366_esm1.pdf]

## **Elektronisches Supplement Material (ESM)**

# **Misshandlungs- und Vernachlässigungserfahrungen in der Kindheit ein Risikofaktor für die soziale Teilhabe ehemals außersfamiliär platzierter junger Erwachsener**

Ergebnisse der schweizweiten Kohorten Studie „Jugendhilfeverläufe: Aus Erfahrung Lernen (JAEL)“

Marc Schmid\*<sup>1</sup>, Jörg M. Fegert\*<sup>2</sup>, Vera Clemens<sup>2</sup>, Süheyla Seker<sup>1</sup>, Delfine d’Huart<sup>1</sup>, Melanie Binder<sup>1</sup>, Martin Schröder<sup>1</sup>, Liz Friden<sup>1</sup>, Cyril Boonmann<sup>1</sup>, Nils Jenkel<sup>1</sup>, Klaus Schmeck<sup>1</sup> & David Bürgin<sup>1</sup>

### **Supplementäre Methoden**

#### **Zusätzliche Informationen zum „Childhood Trauma Questionnaire“ (CTQ)**

Zur Erfassung der Misshandlungserfahrungen wurde der „Childhood Trauma Questionnaire-Short Form (CTQ-SF) als retrospektive Selbstbeurteilung im online Screening verwendet (Bader, Hännly, Schäfer, Neuckel & Kuhl, 2009; Bernstein, Ahluvalia, Pogge & Handelsman, 1997; Bernstein et al., 2003). Der CTQ und seine Kurzversion CTQ-SF sind die international am meisten verwendeten Fragebögen zur Erfassung von Misshandlungserfahrungen in der Kindheit. Die Kurzversion beinhaltet 28 Fragen aus fünf Skalen (emotionaler Missbrauch, körperlicher Missbrauch, sexueller Missbrauch, emotionale Vernachlässigung, körperliche Vernachlässigung) mit je 5 Items und einer Offenheitsskala mit drei Items. Alle Items werden auf einer fünf-stufigen Likert Skala geratet auf der Skala: 1 = trifft gar nicht zu, 2 = trifft etwas zu, 3 = trifft ziemlich zu, 4 trifft stark zu, 5 = trifft vollkommen zu. Bezogen auf psychometrischen Eigenschaften lag die interne Konsistenz bei der deutschen Version zwischen 0.62 und 0.96 für die unterschiedlichen Subskalen. Der Intraklassenkoeffizient für ein Retest-Intervall von 6 Wochen lag für die Gesamtskala bei 0,77 und für die verschiedenen Subskalen zwischen 0,58 und 0,81 (Klinitzke, Romppel, Hauser, Brahler & Glaesmer, 2012). Basierend auf den deutschen Normdaten können Schweregrad-Einteilungen gebildet werden ("nicht-minimal", "minimal-mäßig", "mäßig-schwer" bis "schwer-extrem") (Hauser, Schmutzer, Brahler & Glaesmer, 2011). Für die in dieser Studie gebildeten Variablen zur Anzahl und Formen der Misshandlung für jede der fünf Subskalen ein Cut-off von mindestens "mäßig-schwer" gewählt, äquivalent zu anderen Arbeiten in großen populationsbasierten Studien (Hauser et al., 2011; Witt, Brown, Plener, Brahler & Fegert, 2017). Die Subskalen spezifischen Prävalenzen über alle Formen hinweg sind im Vergleich mit der deutschen Allgemeinbevölkerung in der vorliegenden Studie drastisch erhöht (Witt et al., 2017). Im Vergleich mit anderen Hochrisikostichproben (psychiatrische Patienten und Gefängnisinsassen in Deutschland) zeigen sich keine signifikanten Unterschiede bezogen auf die Schwere der Missbrauchssubskalen (Dudeck et al., 2015). Allerdings liegt die Schwere der berichteten körperlich als auch emotional Vernachlässigungserfahrungen der befragten Care Leaver signifikant höher als bei psychiatrischen Patienten und Gefängnisinsassen (Dudeck et al., 2015).

## **Zusätzliche Beschreibung der spezifischen Verfahren zur Erfassung der sozialen Teilhabe Psychische Störungen**

Psychische Störungen wurden in der JAEL Studie mit dem Structured Clinical Interview for DSM-5 Disorders - Clinician Version (SCID-5)(First & Williams, 2016) erfasst. SCID-5-CV ist ein halbstrukturiertes klinisches Interview, das auf den Dimensionen der Erwachsenenstörungen aus dem DSM-5 basiert und bei Erwachsenen (d. h. > 18 Jahre) eingesetzt wird. Es erfasst die folgenden 10 Dimensionen: affektive Episoden, psychotische und assoziierte Symptome, Differenzialdiagnose psychotischer Störungen, Differenzialdiagnose affektiver Störungen, Störungen durch psychotrope Substanzen, Angststörungen, Zwangsstörungen und posttraumatische Belastungsstörungen, Aufmerksamkeitsdefizit-/Hyperaktivitätsstörung, Screening auf andere Störungen und Anpassungsstörung. Die Items und Diagnosen wurden mit dichotomen Antwortmöglichkeiten bewertet, bestehend aus 1 = vorhanden und 0 = nicht vorhanden.

## **Persönlichkeitsstörungen**

Zur Diagnosestellung einer PS wurde, während der JAEL-Studie das SKID-II verwendet (First, Gibbon, Spitzer, Williams & Benjamin, 1997; Wittchen, M & T, 1997). Das Interview besteht aus 134 Fragen, die auf einer vierstufigen Skala bewertet werden (0=nicht beurteilbar, 1=Kriterium nicht erfüllt, 2=Kriterium teilweise erfüllt, 3=Kriterium erfüllt). Überschreitet die Anzahl der mit 3 kodierten Items der im DSM-IV vorgesehene Schwellenwert, wird die Diagnose der entsprechenden PS vergeben. Die Inter-Rater-Reliabilität für kategoriale Diagnosen variiert zwischen .48 bis .98 (Cohen  $\kappa$ ) und die interne Konsistenz liegt zwischen .71 und .94 (Maffei et al., 1997).

## **Suizidalität**

Der MAYSI-2 ist ein Screening Instrument für spezifische klinische Symptome, die in einem stationären Aufenthalt frühzeitig erkannt und besonders beachtet werden sollten (Grisso & Barnum, 2000). In vielen Staaten der USA wird er flächendeckend in Jugendhilfeeinrichtungen und forensischen Institutionen eingesetzt, um über eine beschleunigte Vorstellung bei einem Kinder- und Jugendpsychiater zu entscheiden. Der MAYSI-2 besteht aus 52 Items und umfasst 7 Skalen: Alkohol/Drogenkonsum (AD), Ärgerlich/Reizbar (ÄR), Depressiv-Ängstlich (DÄ), Somatische Beschwerden (SB), Suizidgedanken (SG), Gedächtnisstörungen (DS) und Traumatische Erfahrungen (TE). Die Antworten zu den Items ergeben Scores auf den 7 oben genannten Skalen. Für die Jungen werden alle Skalen und für die Mädchen nur sechs Skalen ausgewertet (die Skala DS wird ausgelassen). Für jede Skala können die Werten in die Bereiche „unauffällig“ „Grenzwert“ oder „auffällig“ eingeteilt werden. Für die vorliegende Studie wurde der Cut-Off für den Grenzwert genommen um die Subskala Suizgedanken zu dichotomisieren.

## **Lebensbedrohliche Verletzung oder Krankheit**

Wurde erfasst mit einem Item der „Life Events Checklist Revised“ (LEC-R). Der LEC-R ist ein Fragebogen, welcher die Erfahrungen von potenziell traumatisierenden Erlebnissen erfasst. Er enthält eine Liste von 19 schwierigen und stressvollen Ereignissen. Gefragt zu jedem Ereignis: a = ist mir persönlich passiert, b = wurde ich Zeuge von, c = habe gehört, dass es jemand Nahestehendem

passiert ist, d = weiß nicht, e = trifft nicht zu. Teilnehmende die auf die Frage ob man eine Lebensbedrohliche Verletzung oder Erkrankung mit ist mir persönlich passiert antworteten, erfüllen eben jene Dimension der in der Studie implementierten Belastungsscores.

### **Soziale Unterstützung**

Wurde gemessen mit der „Multidimensional Scale of perceived social support“ (MSPSS). Der MSPSS richtet sich auf die subjektive Bewertung der Erfahrung an sozialer Unterstützung. Der Fragebogen enthält 12 Items zu den drei Skalen Familie, Freunde und bedeutsame Andere. Die Rohwerte der einzelnen Items werden aufsummiert und in drei Subskalen und einer Gesamtskala zusammengefasst. Die Subskalen besitzen spezifische Cut-offs zur Einstufung niedrig, mittlere und hohe Unterstützung. In der vorliegenden Studie wurden die Skala Freunde und bedeutsame andere verwendet, als Cut-off diente die Schwelle zwischen mittel und hoch zur Gruppierung. Keine hohe empfundene soziale Unterstützung in diesen Skalen wurde als potenzielle Belastung im sozialen Bereich gezählt.

### **Zusätzliche Informationen zu den Regressionsmodellen**

Sowohl negativ-binomial als auch poisson Regressionsmodelle sind adäquate Analysemodelle für aufsummierte Skalen bestehend aus positiven Integern. Diese Modelle haben gegenüber linearen und ordinalen Modellen den Vorteil, dass sie die Datenstruktur der Outcome Variablen - schiefverteilte Verteilungen mit ausschliesslich positiven Integern - besser abbilden als herkömmliche Regressionsmodelle. Die Modelle wurden kontrolliert für Null-Inflation (Toleranz .10) und Poisson Modelle spezifisch für Überdispersion. Alle Analysemodelle (Tabelle S1-S7) haben diese Tests bestanden, was eine gute Passung der gewählten Analysemodelle indiziert. Die Schätzer aller Regressionen werden nach Potenzierung zur Basis e berichtet ( $e^{\text{Schätzer}}$ ) und entsprechen somit dem relativen Risiko auch Risiko Ratio (RR). Für alle Regressionsmodelle werden die RR mit den jeweiligen 95%-Konfidenzintervallen (KI) und zugehörigen Signifikanzniveaus berichtet.

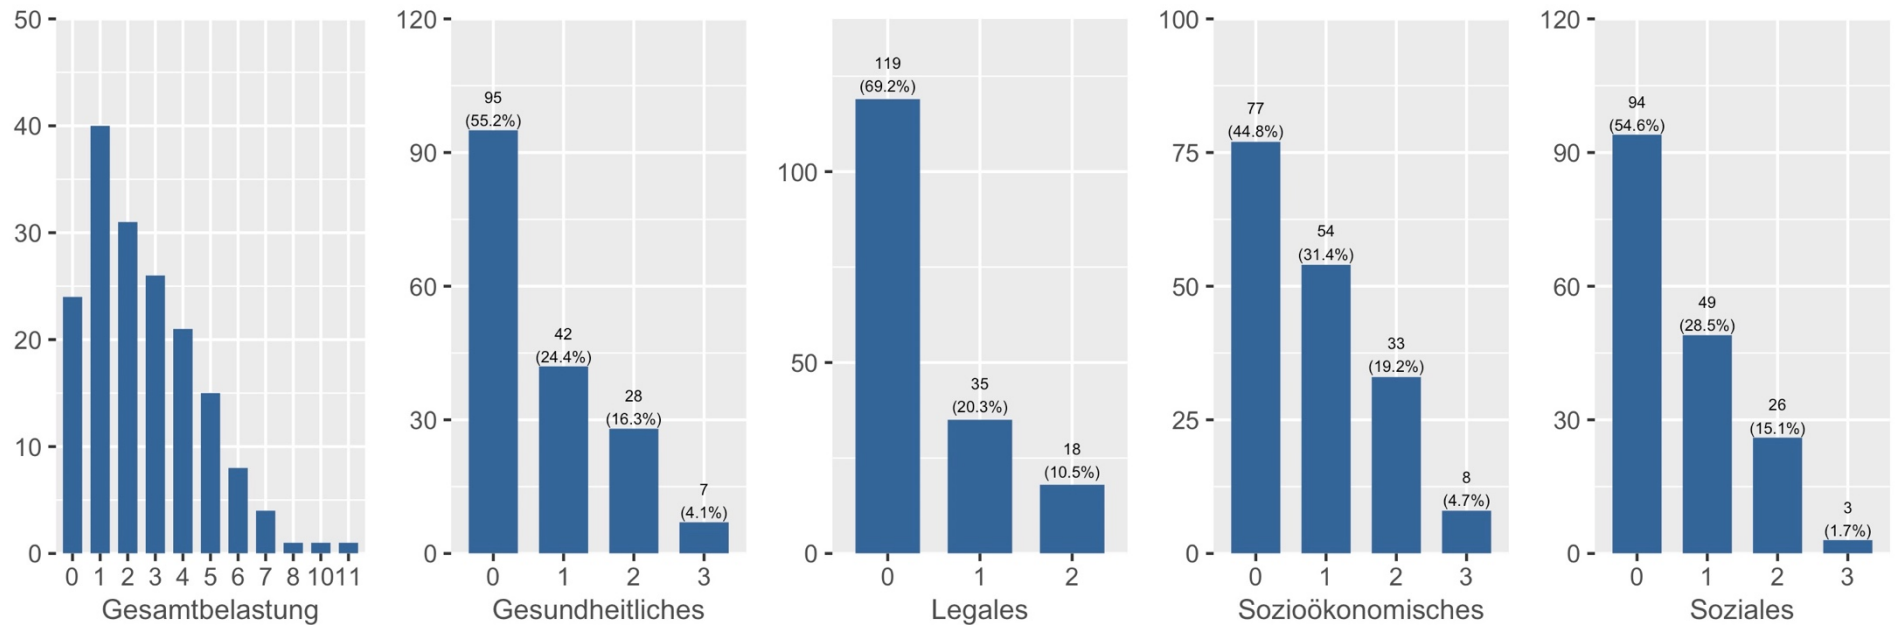

**Abbildung S1.** Kumulation der Belastungen gesamthaft und domänen-spezifisch.

*Anmerkungen:* Die y-Achse beschreibt die Anzahl der Teilnehmenden, die x-Achse beschreibt die jeweilige Anzahl erfüllter Dimensionen auf dem jeweiligen Score. Grundgesamtheit N=172. Diese fünf Scores sind die Outcome Variablen der weiter unten beschriebenen Analyse Modelle dar.

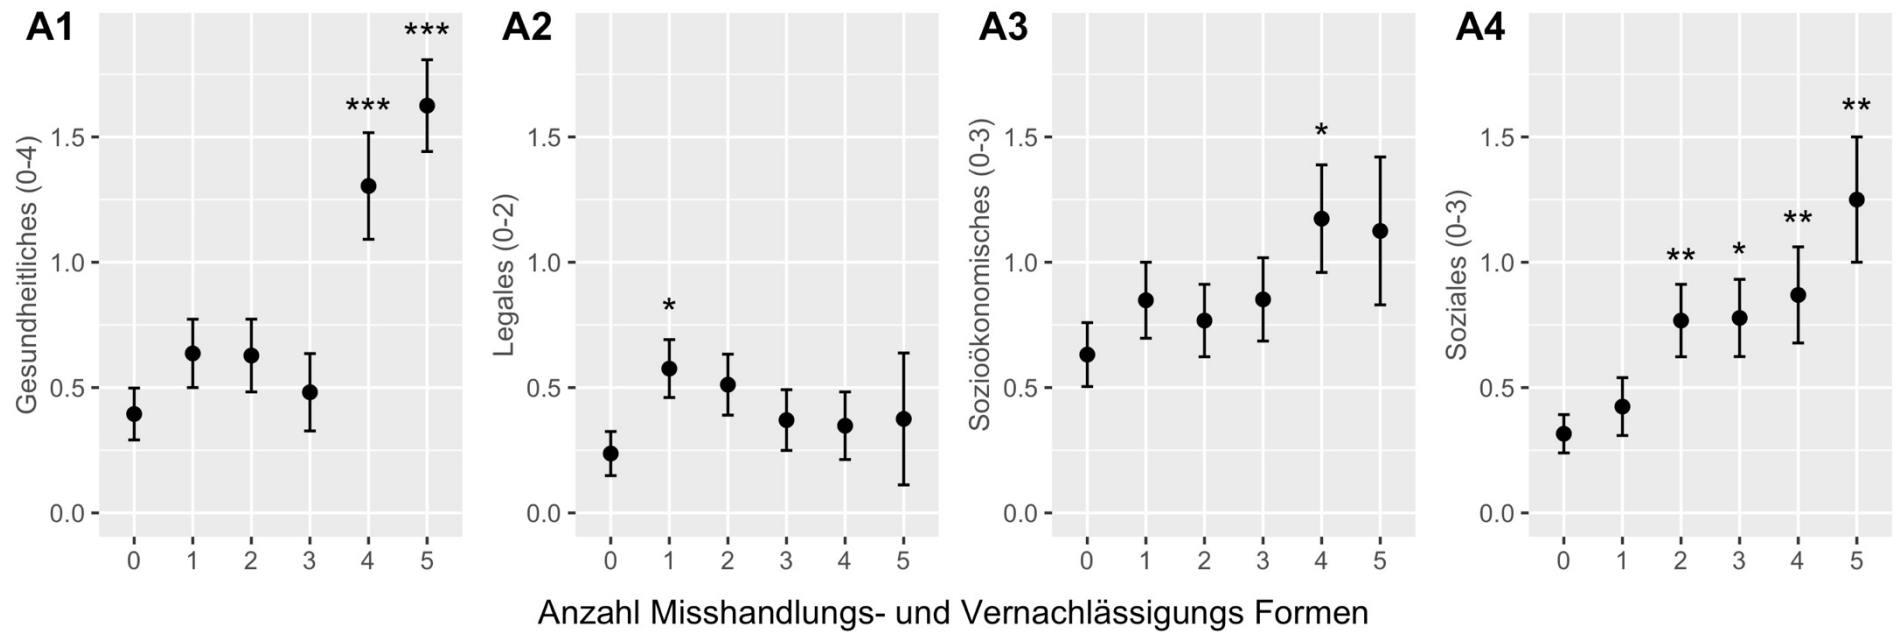

**Abbildung S2.** Anzahl der Misshandlungs- und Vernachlässigungs- Formen und deren Zusammenhang mit der sozialen Teilhabe über die vier spezifischen Belastungsdomänen.

*Anmerkungen:* Fehlerbalken entsprechen +/- einem Standardfehler. Signifikanzen entsprechen dem Test zur Referenzkategorie 0 aus unkontrollierten univariaten poisson Regressionsmodellen (siehe Tabelle S1; A1-A4).

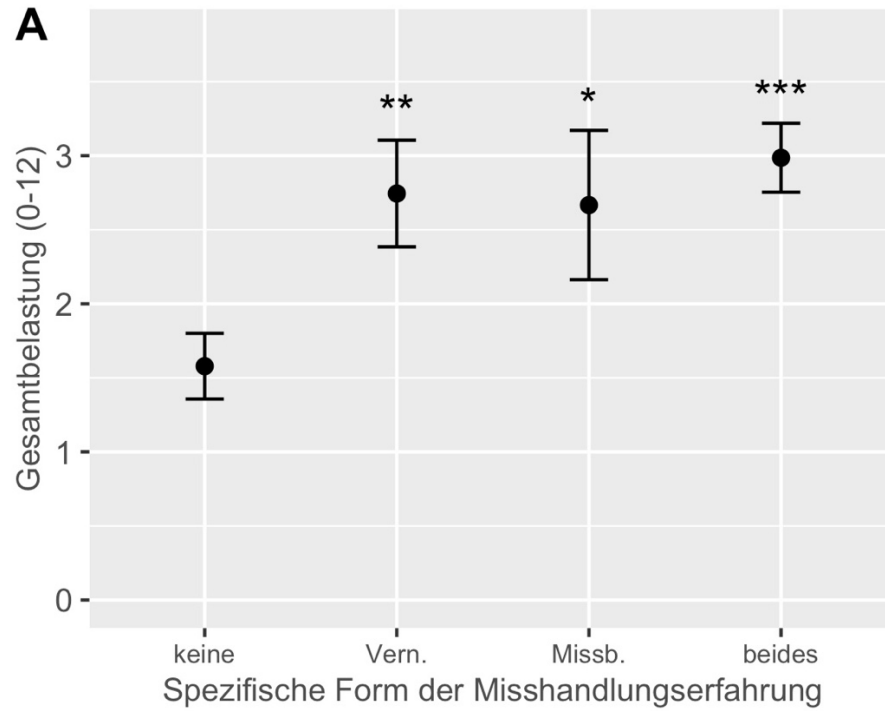

**Abbildung S3.** Spezifische Formen der Misshandlungs- und Vernachlässigungserfahrung und deren Zusammenhang mit der domänen-spezifischen Belastung.

*Anmerkungen:* Fehlerbalken entsprechen +/- einem Standardfehler. Signifikanzen entsprechen dem Test zur Referenzkategorie „keine“ aus univariaten Poisson Regressionsmodellen (siehe *Tabelle S4, B*).

**Tabelle S1.** Univariate Regressions-Modelle der Anzahl an Misshandlungsformen

| Prädiktoren            | A Gesamtbelastung (0-12) <sup>a</sup> |             |                  | A1 Gesundheitliches (0-4) <sup>b</sup> |             |                  | A2 Legales (0-2) <sup>b</sup> |             |                  | A3 Sozioökonomisches (0-3) <sup>b</sup> |             |              | A4 Soziales (0-3) <sup>b</sup> |             |                  |
|------------------------|---------------------------------------|-------------|------------------|----------------------------------------|-------------|------------------|-------------------------------|-------------|------------------|-----------------------------------------|-------------|--------------|--------------------------------|-------------|------------------|
|                        | RR                                    | 95%-KI      | p                | RR                                     | 95%-KI      | p                | RR                            | 95%-KI      | p                | RR                                      | 95%-KI      | p            | RR                             | 95%-KI      | p                |
| Intercept              | 1.58 **                               | 1.18 – 2.08 | <b>0.002</b>     | 0.39 ***                               | 0.23 – 0.63 | <b>&lt;0.001</b> | 0.24 ***                      | 0.11 – 0.43 | <b>&lt;0.001</b> | 0.63 *                                  | 0.41 – 0.92 | <b>0.024</b> | 0.32 ***                       | 0.17 – 0.53 | <b>&lt;0.001</b> |
| Anzahl 1               | 1.57 *                                | 1.07 – 2.32 | <b>0.021</b>     | 1.61                                   | 0.84 – 3.19 | 0.158            | 2.43 *                        | 1.13 – 5.64 | <b>0.028</b>     | 1.34                                    | 0.78 – 2.33 | 0.289        | 1.34                           | 0.62 – 2.96 | 0.453            |
| Anzahl 2               | 1.69 **                               | 1.19 – 2.44 | <b>0.004</b>     | 1.59                                   | 0.86 – 3.06 | 0.149            | 2.16                          | 1.03 – 4.95 | 0.052            | 1.22                                    | 0.72 – 2.08 | 0.468        | 2.43 **                        | 1.29 – 4.90 | <b>0.008</b>     |
| Anzahl 3               | 1.57 *                                | 1.05 – 2.36 | <b>0.028</b>     | 1.22                                   | 0.57 – 2.57 | 0.600            | 1.56                          | 0.63 – 3.94 | 0.331            | 1.35                                    | 0.76 – 2.40 | 0.305        | 2.46 *                         | 1.23 – 5.16 | <b>0.013</b>     |
| Anzahl 4               | 2.34 ***                              | 1.58 – 3.48 | <b>&lt;0.001</b> | 3.30 ***                               | 1.81 – 6.31 | <b>&lt;0.001</b> | 1.47                          | 0.55 – 3.84 | 0.429            | 1.86 *                                  | 1.07 – 3.24 | <b>0.027</b> | 2.75 **                        | 1.36 – 5.80 | <b>0.006</b>     |
| Anzahl 5               | 2.77 ***                              | 1.64 – 4.67 | <b>&lt;0.001</b> | 4.12 ***                               | 1.93 – 8.67 | <b>&lt;0.001</b> | 1.58                          | 0.35 – 5.31 | 0.491            | 1.78                                    | 0.78 – 3.70 | 0.140        | 3.96 **                        | 1.67 – 9.18 | <b>0.001</b>     |
| N                      | 172                                   |             |                  | 172                                    |             |                  | 172                           |             |                  | 172                                     |             |              | 172                            |             |                  |
| R <sup>2</sup> Nagelk. | 0.185                                 |             |                  | 0.193                                  |             |                  | 0.059                         |             |                  | 0.049                                   |             |              | 0.145                          |             |                  |

*Anmerkungen:* RR= relatives Risiko; KI=Konfidenzintervall; <sup>a</sup> negativ-binomial Regression; <sup>b</sup> poisson Regression; \*  $p < 0.05$  \*\*  $p < 0.01$  \*\*\*  $p < 0.001$ .

**Tabelle S2.** Multivariate Regressions-Modelle der Anzahl an Misshandlungsformen

| Prädiktoren            | A Gesamtbelastung (0-12) <sup>a</sup> |             |                  | A1 Gesundheitliches (0-4) <sup>b</sup> |             |                  | A2 Legales (0-2) <sup>b</sup> |              |                  | A3 Sozioökonomisches (0-3) <sup>b</sup> |             |              | A4 Soziales (0-3) <sup>b</sup> |              |              |
|------------------------|---------------------------------------|-------------|------------------|----------------------------------------|-------------|------------------|-------------------------------|--------------|------------------|-----------------------------------------|-------------|--------------|--------------------------------|--------------|--------------|
|                        | RR                                    | 95%-KI      | p                | RR                                     | 95%-KI      | p                | RR                            | 95%-KI       | p                | RR                                      | 95%-KI      | p            | RR                             | 95%-KI       | p            |
| Intercept              | 0.68                                  | 0.26 – 1.78 | 0.429            | 0.11 <sup>*</sup>                      | 0.02 – 0.59 | <b>0.011</b>     | 0.04 <sup>**</sup>            | 0.01 – 0.26  | <b>0.001</b>     | 1.06                                    | 0.26 – 4.10 | 0.929        | 0.15 <sup>*</sup>              | 0.03 – 0.79  | <b>0.027</b> |
| Anzahl 1               | 1.52 <sup>*</sup>                     | 1.04 – 2.23 | <b>0.030</b>     | 1.64                                   | 0.85 – 3.24 | 0.146            | 1.94                          | 0.89 – 4.52  | 0.105            | 1.34                                    | 0.78 – 2.34 | 0.290        | 1.30                           | 0.60 – 2.85  | 0.512        |
| Anzahl 2               | 1.67 <sup>**</sup>                    | 1.17 – 2.39 | <b>0.005</b>     | 1.54                                   | 0.83 – 2.97 | 0.179            | 1.92                          | 0.90 – 4.44  | 0.104            | 1.23                                    | 0.73 – 2.10 | 0.446        | 2.42 <sup>**</sup>             | 1.28 – 4.88  | <b>0.009</b> |
| Anzahl 3               | 1.59 <sup>*</sup>                     | 1.07 – 2.37 | <b>0.022</b>     | 1.21                                   | 0.56 – 2.54 | 0.622            | 1.56                          | 0.63 – 3.92  | 0.335            | 1.35                                    | 0.76 – 2.40 | 0.302        | 2.49 <sup>*</sup>              | 1.24 – 5.22  | <b>0.012</b> |
| Anzahl 4               | 2.38 <sup>***</sup>                   | 1.61 – 3.52 | <b>&lt;0.001</b> | 3.08 <sup>***</sup>                    | 1.67 – 5.93 | <b>&lt;0.001</b> | 1.64                          | 0.61 – 4.30  | 0.313            | 1.90 <sup>*</sup>                       | 1.08 – 3.35 | <b>0.025</b> | 2.82 <sup>**</sup>             | 1.39 – 5.98  | <b>0.005</b> |
| Anzahl 5               | 3.19 <sup>***</sup>                   | 1.87 – 5.43 | <b>&lt;0.001</b> | 3.85 <sup>***</sup>                    | 1.75 – 8.40 | <b>0.001</b>     | 3.49                          | 0.75 – 12.20 | 0.069            | 1.78                                    | 0.76 – 3.85 | 0.158        | 4.66 <sup>***</sup>            | 1.90 – 11.22 | <b>0.001</b> |
| Geschlecht             | 0.85                                  | 0.66 – 1.09 | 0.211            | 1.21                                   | 0.81 – 1.80 | 0.344            | 0.29 <sup>**</sup>            | 0.13 – 0.58  | <b>0.001</b>     | 0.97                                    | 0.67 – 1.40 | 0.887        | 0.81                           | 0.53 – 1.24  | 0.342        |
| Alter                  | 1.04 <sup>*</sup>                     | 1.01 – 1.08 | <b>0.013</b>     | 1.04                                   | 0.98 – 1.10 | 0.173            | 1.14 <sup>***</sup>           | 1.07 – 1.20  | <b>&lt;0.001</b> | 0.98                                    | 0.94 – 1.03 | 0.436        | 1.04                           | 0.98 – 1.10  | 0.174        |
| N                      | 172                                   |             |                  | 172                                    |             |                  | 172                           |              |                  | 172                                     |             |              | 172                            |              |              |
| R <sup>2</sup> Nagelk. | 0.241                                 |             |                  | 0.211                                  |             |                  | 0.331                         |              |                  | 0.054                                   |             |              | 0.168                          |              |              |

*Anmerkungen:* RR= relatives Risiko; KI=Konfidenzintervall; <sup>a</sup> negativ-binomial Regression; <sup>b</sup> poisson Regression; \*  $p < 0.05$  \*\*  $p < 0.01$  \*\*\*  $p < 0.001$ .



**Tabelle S3.** Univariate Regressions-Modelle der unterschiedlichen Formen der Misshandlung

| Prädiktoren            | B Gesamtbelastung (0-12) <sup>a</sup> |             |                  | B1 Gesundheitliches (0-4) <sup>b</sup> |             |                  | B2 Legales (0-2) <sup>b</sup> |             |                  | B3 Sozioökonomisches (0-3) <sup>b</sup> |             |              | B4 Soziales (0-3) <sup>b</sup> |             |                  |
|------------------------|---------------------------------------|-------------|------------------|----------------------------------------|-------------|------------------|-------------------------------|-------------|------------------|-----------------------------------------|-------------|--------------|--------------------------------|-------------|------------------|
|                        | RR                                    | 95%-KI      | p                | RR                                     | 95%-KI      | p                | RR                            | 95%-KI      | p                | RR                                      | 95%-KI      | p            | RR                             | 95%-KI      | p                |
| Intercept              | 1.58 **                               | 1.17 – 2.10 | <b>0.002</b>     | 0.39 ***                               | 0.23 – 0.63 | <b>&lt;0.001</b> | 0.24 ***                      | 0.11 – 0.43 | <b>&lt;0.001</b> | 0.62 **                                 | 0.43 – 0.86 | <b>0.008</b> | 0.33 ***                       | 0.19 – 0.53 | <b>&lt;0.001</b> |
| Vernachlässigung       | 1.74 **                               | 1.21 – 2.51 | <b>0.003</b>     | 1.40                                   | 0.75 – 2.71 | 0.298            | 2.34 *                        | 1.14 – 5.28 | <b>0.028</b>     | 1.45                                    | 0.93 – 2.28 | 0.104        | 2.02 *                         | 1.13 – 3.79 | <b>0.022</b>     |
| Missbrauch             | 1.69 *                                | 1.04 – 2.74 | <b>0.034</b>     | 2.20 *                                 | 1.03 – 4.62 | <b>0.038</b>     | 3.10 *                        | 1.28 – 7.68 | <b>0.012</b>     | 1.11                                    | 0.53 – 2.14 | 0.768        | 1.00                           | 0.33 – 2.58 | 1.000            |
| Beides                 | 1.89 ***                              | 1.36 – 2.67 | <b>&lt;0.001</b> | 2.29 **                                | 1.34 – 4.16 | <b>0.004</b>     | 1.47                          | 0.71 – 3.32 | 0.325            | 1.63 *                                  | 1.10 – 2.50 | <b>0.019</b> | 2.56 ***                       | 1.51 – 4.64 | <b>0.001</b>     |
| N                      |                                       | 172         |                  |                                        | 172         |                  |                               | 172         |                  |                                         | 210         |              |                                | 196         |                  |
| R <sup>2</sup> Nagelk. |                                       | 0.118       |                  |                                        | 0.095       |                  |                               | 0.082       |                  |                                         | 0.046       |              |                                | 0.116       |                  |

*Anmerkungen:* <sup>a</sup> RR= relatives Risiko; KI=Konfidenzintervall; negativ-binomial Regression; <sup>b</sup> poisson Regression; \*  $p < 0.05$  \*\*  $p < 0.01$  \*\*\*  $p < 0.001$ .

**Tabelle S4.** Multivariate Regressions-Modelle der unterschiedlichen Formen der Misshandlung

| Prädiktoren            | B Gesamtbelastung (0-12) <sup>a</sup> |             |                  | B1 Gesundheitliches (0-4) <sup>b</sup> |             |              | B2 Legales (0-2) <sup>b</sup> |             |                  | B3 Sozioökonomisches (0-3) <sup>b</sup> |             |       | B4 Soziales (0-3) <sup>b</sup> |             |              |
|------------------------|---------------------------------------|-------------|------------------|----------------------------------------|-------------|--------------|-------------------------------|-------------|------------------|-----------------------------------------|-------------|-------|--------------------------------|-------------|--------------|
|                        | RR                                    | 95%-KI      | p                | RR                                     | 95%-KI      | p            | RR                            | 95%-KI      | p                | RR                                      | 95%-KI      | p     | RR                             | 95%-KI      | p            |
| Intercept              | 0.58                                  | 0.21 – 1.59 | 0.281            | 0.11 **                                | 0.02 – 0.55 | <b>0.008</b> | 0.04 **                       | 0.01 – 0.27 | <b>0.001</b>     | 0.90                                    | 0.23 – 3.44 | 0.885 | 0.11 **                        | 0.02 – 0.53 | <b>0.007</b> |
| Vernachlässigung       | 1.72 **                               | 1.20 – 2.47 | <b>0.003</b>     | 1.45                                   | 0.78 – 2.81 | 0.253        | 1.92                          | 0.93 – 4.37 | 0.095            | 1.42                                    | 0.87 – 2.38 | 0.173 | 2.34 *                         | 1.25 – 4.70 | <b>0.011</b> |
| Missbrauch             | 1.57                                  | 0.97 – 2.54 | 0.066            | 2.05                                   | 0.95 – 4.32 | 0.060        | 2.29                          | 0.93 – 5.81 | 0.072            | 1.19                                    | 0.56 – 2.39 | 0.635 | 0.98                           | 0.31 – 2.65 | 0.967        |
| Beides                 | 1.91 ***                              | 1.37 – 2.69 | <b>&lt;0.001</b> | 2.14 **                                | 1.25 – 3.91 | <b>0.009</b> | 1.69                          | 0.81 – 3.83 | 0.180            | 1.46                                    | 0.92 – 2.39 | 0.116 | 2.56 **                        | 1.42 – 5.02 | <b>0.003</b> |
| Geschlecht             | 0.96                                  | 0.74 – 1.23 | 0.736            | 1.36                                   | 0.93 – 1.99 | 0.112        | 0.32 **                       | 0.15 – 0.63 | <b>0.002</b>     | 1.04                                    | 0.72 – 1.48 | 0.820 | 0.98                           | 0.64 – 1.47 | 0.906        |
| Alter                  | 1.04 *                                | 1.01 – 1.08 | <b>0.016</b>     | 1.03                                   | 0.98 – 1.09 | 0.222        | 1.13 ***                      | 1.06 – 1.20 | <b>&lt;0.001</b> | 0.98                                    | 0.94 – 1.03 | 0.509 | 1.04                           | 0.99 – 1.10 | 0.115        |
| N                      | 172                                   |             |                  | 172                                    |             |              | 172                           |             |                  | 172                                     |             |       | 172                            |             |              |
| R <sup>2</sup> Nagelk. | 0.162                                 |             |                  | 0.124                                  |             |              | 0.326                         |             |                  | 0.031                                   |             |       | 0.137                          |             |              |

Anmerkungen: RR= relatives Risiko; KI=Konfidenzintervall; <sup>a</sup> negativ-binomial Regression; <sup>b</sup> poisson Regression; \* p<0.05 \*\* p<0.01 \*\*\* p<0.001.

**Tabelle S5.** Multivariate Regressions-Modelle der Anzahl an Misshandlungsformen inklusive dem protektiven Faktor Selbstwirksamkeit

| Prädiktoren            | C Gesamtbelastung (0-12) <sup>a</sup> |             |                  | C1 Gesundheitliches (0-4) <sup>b</sup> |             |                  | C2 Legales (0-2) <sup>b</sup> |              |                  | C3 Sozioökonomisches (0-3) <sup>b</sup> |             |              | C4 Soziales (0-3) <sup>b</sup> |             |                  |
|------------------------|---------------------------------------|-------------|------------------|----------------------------------------|-------------|------------------|-------------------------------|--------------|------------------|-----------------------------------------|-------------|--------------|--------------------------------|-------------|------------------|
|                        | RR                                    | 95%-KI      | p                | RR                                     | 95%-KI      | p                | RR                            | 95%-KI       | p                | RR                                      | 95%-KI      | p            | RR                             | 95%-KI      | p                |
| Intercept              | 0.52                                  | 0.20 – 1.32 | 0.169            | 0.08 **                                | 0.01 – 0.45 | <b>0.005</b>     | 0.04 **                       | 0.00 – 0.26  | <b>0.001</b>     | 0.96                                    | 0.23 – 3.84 | 0.957        | 0.10 *                         | 0.02 – 0.56 | <b>0.010</b>     |
| Anzahl 1               | 1.42                                  | 0.99 – 2.04 | 0.059            | 1.45                                   | 0.75 – 2.88 | 0.277            | 1.92                          | 0.88 – 4.50  | 0.112            | 1.29                                    | 0.74 – 2.24 | 0.369        | 1.15                           | 0.53 – 2.53 | 0.732            |
| Anzahl 2               | 1.51 *                                | 1.08 – 2.13 | <b>0.018</b>     | 1.33                                   | 0.71 – 2.58 | 0.385            | 1.91                          | 0.89 – 4.42  | 0.109            | 1.15                                    | 0.68 – 1.98 | 0.596        | 2.06 *                         | 1.08 – 4.18 | <b>0.035</b>     |
| Anzahl 3               | 1.50 *                                | 1.03 – 2.19 | <b>0.035</b>     | 1.10                                   | 0.51 – 2.32 | 0.801            | 1.55                          | 0.62 – 3.91  | 0.341            | 1.30                                    | 0.73 – 2.31 | 0.374        | 2.30 *                         | 1.15 – 4.84 | <b>0.022</b>     |
| Anzahl 4               | 1.95 ***                              | 1.34 – 2.84 | <b>0.001</b>     | 2.28 *                                 | 1.20 – 4.47 | <b>0.013</b>     | 1.60                          | 0.59 – 4.30  | 0.347            | 1.65                                    | 0.93 – 2.96 | 0.086        | 2.04                           | 0.98 – 4.41 | 0.061            |
| Anzahl 5               | 2.76 ***                              | 1.67 – 4.51 | <b>&lt;0.001</b> | 3.03 **                                | 1.35 – 6.73 | <b>0.006</b>     | 3.47                          | 0.75 – 12.16 | 0.070            | 1.58                                    | 0.67 – 3.45 | 0.270        | 3.76 **                        | 1.51 – 9.22 | <b>0.004</b>     |
| z-SWE                  | 0.78 ***                              | 0.70 – 0.86 | <b>&lt;0.001</b> | 0.68 ***                               | 0.56 – 0.83 | <b>&lt;0.001</b> | 0.98                          | 0.78 – 1.22  | 0.838            | 0.82 *                                  | 0.68 – 0.97 | <b>0.025</b> | 0.66 ***                       | 0.53 – 0.81 | <b>&lt;0.001</b> |
| Geschlecht             | 0.86                                  | 0.68 – 1.09 | 0.212            | 1.23                                   | 0.82 – 1.83 | 0.311            | 0.29 **                       | 0.13 – 0.58  | <b>0.001</b>     | 0.98                                    | 0.67 – 1.41 | 0.912        | 0.82                           | 0.52 – 1.25 | 0.365            |
| Alter                  | 1.05 **                               | 1.02 – 1.09 | <b>0.001</b>     | 1.05                                   | 0.99 – 1.12 | 0.079            | 1.14 ***                      | 1.07 – 1.21  | <b>&lt;0.001</b> | 0.99                                    | 0.94 – 1.04 | 0.580        | 1.06                           | 1.00 – 1.12 | 0.061            |
| N                      | 172                                   |             |                  | 172                                    |             |                  | 172                           |              |                  | 172                                     |             |              | 172                            |             |                  |
| R <sup>2</sup> Nagelk. | 0.380                                 |             |                  | 0.309                                  |             |                  | 0.332                         |              |                  | 0.096                                   |             |              | 0.289                          |             |                  |

Anmerkungen: RR= relatives Risiko; KI=Konfidenzintervall; <sup>a</sup> negativ-binomial Regression; <sup>b</sup> poisson Regression; \*  $p<0.05$  \*\*  $p<0.01$  \*\*\*  $p<0.001$ .

**Tabelle S6.** Multivariate Regressions-Modelle der unterschiedlichen Formen der Misshandlung inklusive dem protektiven Faktor Selbstwirksamkeit

| Prädiktoren            | D Gesamtbelastung (0-12) <sup>a</sup> |             |                  | D1 Gesundheitliches (0-4) <sup>b</sup> |             |                  | D2 Legales (0-2) <sup>b</sup> |             |                  | D3 Sozioökonomisches (0-3) <sup>b</sup> |             |              | D4 Soziales (0-3) <sup>b</sup> |             |                  |
|------------------------|---------------------------------------|-------------|------------------|----------------------------------------|-------------|------------------|-------------------------------|-------------|------------------|-----------------------------------------|-------------|--------------|--------------------------------|-------------|------------------|
|                        | RR                                    | 95%-KI      | p                | RR                                     | 95%-KI      | p                | RR                            | 95%-KI      | p                | RR                                      | 95%-KI      | p            | RR                             | 95%-KI      | p                |
| Intercept              | 0.46                                  | 0.17 – 1.18 | 0.103            | 0.08 **                                | 0.01 – 0.41 | <b>0.003</b>     | 0.04 **                       | 0.00 – 0.27 | <b>0.001</b>     | 0.84                                    | 0.20 – 3.31 | 0.805        | 0.08 **                        | 0.01 – 0.45 | <b>0.005</b>     |
| Vernachlässigung       | 1.54 *                                | 1.10 – 2.18 | <b>0.013</b>     | 1.20                                   | 0.64 – 2.33 | 0.587            | 1.91                          | 0.92 – 4.35 | 0.100            | 1.33                                    | 0.81 – 2.23 | 0.275        | 1.97 *                         | 1.04 – 3.99 | <b>0.045</b>     |
| Missbrauch             | 1.45                                  | 0.92 – 2.27 | 0.107            | 1.85                                   | 0.86 – 3.92 | 0.109            | 2.28                          | 0.92 – 5.79 | 0.076            | 1.14                                    | 0.53 – 2.29 | 0.718        | 0.89                           | 0.28 – 2.42 | 0.827            |
| Beides                 | 1.68 **                               | 1.22 – 2.33 | <b>0.002</b>     | 1.72                                   | 0.99 – 3.18 | 0.066            | 1.67                          | 0.80 – 3.82 | 0.191            | 1.34                                    | 0.84 – 2.21 | 0.233        | 2.13 *                         | 1.17 – 4.22 | <b>0.020</b>     |
| z-SWE                  | 0.76 ***                              | 0.68 – 0.85 | <b>&lt;0.001</b> | 0.64 ***                               | 0.53 – 0.78 | <b>&lt;0.001</b> | 0.98                          | 0.78 – 1.23 | 0.877            | 0.81 *                                  | 0.68 – 0.96 | <b>0.014</b> | 0.66 ***                       | 0.54 – 0.81 | <b>&lt;0.001</b> |
| Geschlecht             | 0.95                                  | 0.75 – 1.20 | 0.682            | 1.35                                   | 0.92 – 1.98 | 0.126            | 0.32 **                       | 0.15 – 0.63 | <b>0.002</b>     | 1.03                                    | 0.72 – 1.47 | 0.864        | 0.95                           | 0.62 – 1.43 | 0.801            |
| Alter                  | 1.05 **                               | 1.02 – 1.09 | <b>0.001</b>     | 1.05                                   | 0.99 – 1.12 | 0.088            | 1.13 ***                      | 1.06 – 1.20 | <b>&lt;0.001</b> | 0.99                                    | 0.94 – 1.04 | 0.659        | 1.06                           | 1.00 – 1.12 | 0.056            |
| N                      | 172                                   |             |                  | 172                                    |             |                  | 172                           |             |                  | 172                                     |             |              | 172                            |             |                  |
| R <sup>2</sup> Nagelk. | 0.324                                 |             |                  | 0.263                                  |             |                  | 0.326                         |             |                  | 0.082                                   |             |              | 0.263                          |             |                  |

*Anmerkungen:* RR= relatives Risiko; KI=Konfidenzintervall; <sup>a</sup> negativ-binomial Regression; <sup>b</sup> poisson Regression; \*  $p<0.05$  \*\*  $p<0.01$  \*\*\*  $p<0.001$ .

**Tabelle S7.** Regressions-Modelle der intervallskalierten Misshandlungsschwere und der Selbstwirksamkeit

| Prädiktoren            | Gesamtbelastung (0-12) <sup>a</sup> |             |        | Gesamtbelastung (0-12) <sup>a</sup> |             |        | Gesamtbelastung (0-12) <sup>a</sup> |             |        |
|------------------------|-------------------------------------|-------------|--------|-------------------------------------|-------------|--------|-------------------------------------|-------------|--------|
|                        | RR                                  | 95%-KI      | p      | RR                                  | 95%-KI      | p      | RR                                  | 95%-KI      | p      |
| Intercept              | 2.50 ***                            | 2.22 – 2.80 | <0.001 | 2.46 ***                            | 2.20 – 2.75 | <0.001 | 0.74                                | 0.29 – 1.85 | 0.512  |
| z-CTQ-total            | 1.28 ***                            | 1.14 – 1.43 | <0.001 | 1.22 ***                            | 1.09 – 1.36 | <0.001 | 1.25 ***                            | 1.12 – 1.40 | <0.001 |
| z-SWE                  |                                     |             |        | 0.78 ***                            | 0.70 – 0.88 | <0.001 | 0.76 ***                            | 0.68 – 0.85 | <0.001 |
| Geschlecht             |                                     |             |        |                                     |             |        | 0.85                                | 0.67 – 1.08 | 0.192  |
| Alter                  |                                     |             |        |                                     |             |        | 1.06 ***                            | 1.02 – 1.09 | 0.001  |
| N                      |                                     | 172         |        |                                     | 172         |        |                                     | 172         |        |
| R <sup>2</sup> Nagelk. |                                     | 0.133       |        |                                     | 0.261       |        |                                     | 0.350       |        |

*Anmerkungen:* RR= relatives Risiko; KI=Konfidenzintervall; <sup>a</sup> negativ-binomial Regression; z = z-skalierte, standardisierte Prädiktoren; \* p<0.05 \*\* p<0.01 \*\*\* p<0.001.

## Literatur

- Bader, K., Hänny, C., Schäfer, V., Neuckel, A. & Kuhl, C. (2009). Childhood trauma questionnaire—psychometrische Eigenschaften einer deutschsprachigen Version. *Zeitschrift für Klinische Psychologie und Psychotherapie*, 38(4), 223-230.
- Bernstein, D. P., Ahluvalia, T., Pogge, D. & Handelsman, L. (1997). Validity of the Childhood Trauma Questionnaire in an adolescent psychiatric population. *J Am Acad Child Adolesc Psychiatry*, 36(3), 340-348. 10.1097/00004583-199703000-00012
- Bernstein, D. P., Stein, J. A., Newcomb, M. D., Walker, E., Pogge, D., Ahluvalia, T. et al. (2003). Development and validation of a brief screening version of the Childhood Trauma Questionnaire. *Child Abuse Negl*, 27(2), 169-190. 10.1016/s0145-2134(02)00541-0
- Dudeck, M., Vasic, N., Otte, S., Streb, J., Wingenfeld, K., Grabe, H. J. et al. (2015). Factorial Validity of the Short Form of the Childhood Trauma Questionnaire (CTQ—SF) in German Psychiatric Patients, Inmates, and University Students. *Psychological Reports*, 116(3), 685-703. 10.2466/16.03.PRO.116k27w5
- First, M., Gibbon, M., Spitzer, R., Williams, J. & Benjamin, L. (1997). Structured clinical interview for DSM-IV II personality disorders (SCID-II).
- First, M. B. & Williams, J. B. (2016). *SCID-5-CV: Structured Clinical Interview for DSM-5 Disorders: Clinician Version*: American Psychiatric Association Publishing.
- Grisso, T. & Barnum, R. (2000). *Massachusetts Youth Screening Instrument-2 (MAYSI-2)*: Worcester, MA: University of Massachusetts Medical School.
- Hauser, W., Schmutzer, G., Brahler, E. & Glaesmer, H. (2011). Maltreatment in childhood and adolescence: results from a survey of a representative sample of the German population. *Dtsch Arztebl Int*, 108(17), 287-294. 10.3238/arztebl.2011.0287
- Klinitzke, G., Romppel, M., Hauser, W., Brahler, E. & Glaesmer, H. (2012). [The German Version of the Childhood Trauma Questionnaire (CTQ): psychometric characteristics in a representative sample of the general population]. *Psychother Psychosom Med Psychol*, 62(2), 47-51. 10.1055/s-0031-1295495
- Witt, A., Brown, R. C., Plener, P. L., Brahler, E. & Fegert, J. M. (2017). Child maltreatment in Germany: prevalence rates in the general population. *Child Adolesc Psychiatry Ment Health*, 11(1), 47. 10.1186/s13034-017-0185-0
- Wittchen, H., M, Z. & T, F. (1997). Strukturiertes Klinisches Interview für DSM-IV (SKID-I und SKID-II). *Göttingen: Hogrefe*.
